# Supplementary material for: Ankle fractures: a systematic review of patient-reported outcome measures and their measurement properties
Source: Springer Nature journal article supplement (doi:10.1007/s11136-022-03166-3), 2022-06-18
Supplement: MOESM2 [file 23181114]

**Article title**

Ankle Fractures: A Systematic Review of Patient Reported Outcome Measures and their measurement properties

**Journal name**

Quality of Life Research

**Author information**

Michael Quan Nguyen<sup>1,2</sup>, Ingvild Dalen<sup>2,3</sup>, Marjolein Memelink Iversen<sup>4,5</sup>, Knut Harboe<sup>1,6</sup>, Aksel Paulsen<sup>1,7</sup>

<sup>1</sup>Department of Orthopedic Surgery, Stavanger University Hospital, Helse Stavanger HF.

<sup>2</sup>Department of Quality and Health Technology, Faculty of Health Sciences, University of Stavanger.

<sup>3</sup>Department of Research, Stavanger University Hospital, Helse Stavanger HF.

<sup>4</sup>Centre on Patient-reported Outcomes, Department of Research and Development, Haukeland University Hospital, Helse Bergen HF.

<sup>5</sup>Department of Health and Caring Sciences, Faculty of Health and Social Sciences, Western Norway University of Applied Sciences.

<sup>6</sup>Department of Clinical Medicine, Faculty of Medicine, University of Bergen.

<sup>7</sup>Department of Public Health, Faculty of Health Sciences, University of Stavanger.

**Corresponding author:**

Michael Quan Nguyen

E-mail: n.michael.quan@gmail.com

ORCID: 0000-0003-0270-9518

**Online Resource 2** Threshold categories for correlations and ground set of hypotheses for construct validity

**Table 1** The threshold categories for correlations with comparator instruments

| Category         | Correlation     |
|------------------|-----------------|
| Weak             | $r < 0.3$       |
| Weak to moderate | $0.2 < r < 0.4$ |
| Moderate         | $0.3 < r < 0.7$ |
| Moderate to high | $0.6 < r < 0.8$ |
| High             | $r > 0.7$       |

**Table 2** The ground set of hypotheses for assessing construct validity

| Hypothesis number | Hypothesis                                                                                                       |
|-------------------|------------------------------------------------------------------------------------------------------------------|
| 1                 | Correlations with instruments measuring <u>same</u> construct should be at least moderate to high ( $r > 0.6$ )  |
| 2                 | Correlations with instruments measuring <u>related</u> constructs should be moderate ( $0.3 < r < 0.7$ )         |
| 3                 | Correlations with instruments measuring weakly related constructs should be weak to moderate ( $0.2 < r < 0.4$ ) |
