# Supplementary material for: Ankle fractures: a systematic review of patient-reported outcome measures and their measurement properties
Source: Springer Nature journal article supplement (doi:10.1007/s11136-022-03166-3), 2022-06-18
Supplement: MOESM3 [file 23181114]

**Article title**

Ankle Fractures: A Systematic Review of Patient Reported Outcome Measures and their measurement properties

**Journal name**

Quality of Life Research

**Author information**

Michael Quan Nguyen<sup>1,2</sup>, Ingvild Dalen<sup>2,3</sup>, Marjolein Memelink Iversen<sup>4,5</sup>, Knut Harboe<sup>1,6</sup>, Aksel Paulsen<sup>1,7</sup>

<sup>1</sup>Department of Orthopedic Surgery, Stavanger University Hospital, Helse Stavanger HF.

<sup>2</sup>Department of Quality and Health Technology, Faculty of Health Sciences, University of Stavanger.

<sup>3</sup>Department of Research, Stavanger University Hospital, Helse Stavanger HF.

<sup>4</sup>Centre on Patient-reported Outcomes, Department of Research and Development, Haukeland University Hospital, Helse Bergen HF.

<sup>5</sup>Department of Health and Caring Sciences, Faculty of Health and Social Sciences, Western Norway University of Applied Sciences.

<sup>6</sup>Department of Clinical Medicine, Faculty of Medicine, University of Bergen.

<sup>7</sup>Department of Public Health, Faculty of Health Sciences, University of Stavanger.

**Corresponding author:**

Michael Quan Nguyen

E-mail: n.michael.quan@gmail.com

ORCID: 0000-0003-0270-9518

**Online Resource 3** Hypotheses for assessing construct validity of PROMs

| <b>PROM under study</b>                  | <b>Reference</b>         | <b>Comparator instrument/domains</b>                                                                              | <b>Hypothesis number (direction)</b>      |
|------------------------------------------|--------------------------|-------------------------------------------------------------------------------------------------------------------|-------------------------------------------|
| AAOS-FAOQ<br>Global foot and ankle scale | Zelle 2017               | SF-36:<br>PCS<br>MCS                                                                                              | 2 (+)<br>3 (+)                            |
| AAOS-FAOQ<br>Shoe comfort scale          | Zelle 2017               | SF-36:<br>PCS<br>MCS                                                                                              | 2 (+)<br>3 (+)                            |
| LEFS                                     | Garratt 2018, Lin 2009   | OMAS                                                                                                              | 1 (+)                                     |
| LEFS                                     | Garratt 2018             | SEFAS                                                                                                             | 1 (-)                                     |
| LEFS                                     | Garratt 2018             | EQ-5D-3L domains:<br>- mobility<br>- self-care<br>- usual activities<br>- pain/discomfort<br>- anxiety/depression | 2 (-)<br>2 (-)<br>2 (-)<br>2 (-)<br>2 (-) |
| LEFS                                     | Garratt 2018             | EQ-5D-3L index                                                                                                    | 2 (-)                                     |
| LEFS                                     | Garratt 2018             | SF-36 PF scale                                                                                                    | 2 (+)                                     |
| LEFS                                     | Repo 2017                | 15D domains:<br>- mobility<br>- usual activities<br>- discomfort and symptoms<br>- vitality                       | 1 (+)<br>1 (+)<br>2 (+)<br>2 (+)          |
| MAQ-ADL                                  | Greve 2018               | FAAM-ADL                                                                                                          | 1 (+)                                     |
| MAQ-ADL                                  | Greve 2018               | FAOS-ADL                                                                                                          | 1 (+)                                     |
| MAQ-pain                                 | Greve 2018               | FAOS-pain                                                                                                         | 1 (+)                                     |
| OMAS                                     | Büker 2017, Nilsson 2013 | GSRF                                                                                                              | 1 (-)                                     |
| OMAS                                     | Büker 2017, Nilsson 2013 | FAOS domains:<br>- QoL<br>- symptoms/stiffness<br>- pain<br>- ADL<br>- sport                                      | 1 (+)<br>1 (+)<br>1 (+)<br>1 (+)<br>1 (+) |
| OMAS                                     | McKeown 2021             | MOxFQ-index <sup>1</sup>                                                                                          | 1 (-)                                     |
| OMAS                                     | McKeown 2021             | MOxFQ-domains <sup>1</sup> :<br>- walking/standing<br>- pain<br>- social interaction                              | 1 (-)<br>1 (-)<br>1 (-)                   |
| OMAS                                     | McKeown 2021             | EQ-5D-5L domains:<br>- mobility<br>- self-care<br>- usual activities<br>- pain/discomfort<br>- anxiety/depression | 2 (-)<br>2 (-)<br>2 (-)<br>2 (-)<br>2 (-) |
| OMAS                                     | McKeown 2021             | EQ-5D-5L index                                                                                                    | 2 (+)                                     |

| <b>PROM under study</b> | <b>Reference</b>          | <b>Comparator instrument/domains</b> | <b>Hypothesis number (direction)</b> |
|-------------------------|---------------------------|--------------------------------------|--------------------------------------|
| OMAS                    | McKeown 2021              | EQ-VAS                               | 2 (+)                                |
| OMAS                    | McKeown 2021              | DRI                                  | 2 (-)                                |
| OMAS                    | Garratt 2018              | SEFAS                                | 1 (-)                                |
| OMAS                    | Garratt 2018              | LEFS                                 | 1 (+)                                |
| OMAS                    | Garratt 2018              | EQ-5D-3L domains                     |                                      |
|                         |                           | - mobility                           | 2 (-)                                |
|                         |                           | - self-care                          | 2 (-)                                |
|                         |                           | - usual activities                   | 2 (-)                                |
|                         |                           | - pain/discomfort                    | 2 (-)                                |
|                         |                           | - anxiety/depression                 | 2 (-)                                |
| OMAS                    | Garratt 2018              | EQ-5D-3L index                       | 2 (+)                                |
| OMAS                    | Garratt 2018              | SF-36 PF                             | 2 (+)                                |
| OMAS                    | Ponzer 1999               | SF-36 domains:                       |                                      |
|                         |                           | - PF                                 | 2 (+)                                |
|                         |                           | - role physical                      | 2 (+)                                |
|                         |                           | - pain                               | 2 (+)                                |
|                         |                           | - general health                     | 2 (+)                                |
|                         |                           | - social functioning                 | 2 (+)                                |
|                         |                           | - energy/fatigue                     | 3 (+)                                |
|                         |                           | - role emotional                     | 3 (+)                                |
|                         |                           | - mental health                      | 3 (+)                                |
| OMAS                    | Ponzer 1999               | VAS-physical health                  | 2 (-)                                |
| OMAS                    | Ponzer 1999               | VAS-mental health                    | 3 (-)                                |
| OMAS                    | Turhan 2017               | FAAM:                                |                                      |
|                         |                           | - ADL                                | 1 (+)                                |
|                         |                           | - sports                             | 1 (+)                                |
| OMAS                    | Turhan 2017,<br>Shah 2007 | SF-12 PCS                            | 2 (+)                                |
| OMAS                    | Shah 2007                 | SF-12 MCS                            | 3 (+)                                |
| PROMIS LE CAT           | Gausden 2018              | FAOS domains:                        |                                      |
|                         |                           | - QoL                                | 2 (+)                                |
|                         |                           | - symptoms/stiffness                 | 1 (+)                                |
|                         |                           | - pain                               | 1 (+)                                |
|                         |                           | - ADL                                | 1 (+)                                |
|                         |                           | - Sport                              | 1 (+)                                |
| PROMIS LE CAT           | Gausden 2018              | OMAS                                 | 1 (+)                                |
| PROMIS PF ver 1.2 CAT   | Gausden 2018              | FAOS domains:                        |                                      |
|                         |                           | - QoL                                | 2 (+)                                |
|                         |                           | - symptoms/stiffness                 | 1 (+)                                |
|                         |                           | - pain                               | 1 (+)                                |
|                         |                           | - ADL                                | 1 (+)                                |
|                         |                           | - sport                              | 1 (+)                                |
| PROMIS PF ver 1.2 CAT   | Gausden 2018              | OMAS                                 | 1 (+)                                |

| <b>PROM under study</b>                               | <b>Reference</b>    | <b>Comparator instrument/domains</b> | <b>Hypothesis number (direction)</b> |
|-------------------------------------------------------|---------------------|--------------------------------------|--------------------------------------|
| SEFAS                                                 | Garratt 2018        | OMAS                                 | 1 (-)                                |
| SEFAS                                                 | Garratt 2018        | LEFS                                 | 1 (-)                                |
| SEFAS                                                 | Garratt 2018        | EQ-5D-3L domains                     |                                      |
|                                                       |                     | - mobility                           | 2 (-)                                |
|                                                       |                     | - self-care                          | 2 (-)                                |
|                                                       |                     | - usual activities                   | 2 (-)                                |
|                                                       |                     | - pain/discomfort                    | 2 (-)                                |
|                                                       |                     | - anxiety/depression                 | 2 (-)                                |
| SEFAS                                                 | Garratt 2018        | EQ-5D-3L index                       | 2 (-)                                |
| SEFAS                                                 | Garratt 2018        | SF-36 PF                             | 2 (-)                                |
| SMFA ADL                                              | Obremskey 2007      | SF-36 PF                             | 1 (-)                                |
| SMFA bother index                                     | Obremskey 2007      | SF-36 domains:                       |                                      |
|                                                       |                     | - physical role limitations          | 2 (-)                                |
|                                                       |                     | - emotional role limitations         | 2 (-)                                |
| SMFA dysfunction index                                | Obremskey 2007      | SF-36 PF                             | 2 (-)                                |
| SMFA emotional                                        | Obremskey 2007      | SF-36 domains:                       |                                      |
|                                                       |                     | - emotional role limitations         | 2 (-)                                |
|                                                       |                     | - mental health                      | 2 (-)                                |
|                                                       |                     | - energy/fatigue                     | 2 (-)                                |
| SMFA mobility                                         | Obremskey 2007      | SF-36 PF                             | 2 (-)                                |
| TEFTOM (only TOM part)                                | Suk 2013, Fang 2020 | FAOS domains:                        |                                      |
|                                                       |                     | - QoL                                | 2 (+)                                |
|                                                       |                     | - symptoms/stiffness                 | 2 (+)                                |
|                                                       |                     | - pain                               | 2 (+)                                |
|                                                       |                     | - ADL                                | 2 (+)                                |
|                                                       |                     | - sport                              | 2 (+)                                |
| TEFTOM (only TOM part)                                | Suk 2013, Fang 2020 | SF-36 PF                             | 2 (+)                                |
| TEFTOM (only TOM part)                                | Suk 2013, Fang 2020 | SF-36 PCS                            | 2 (+)                                |
| TEFTOM (only TOM part)                                | Suk 2013, Fang 2020 | AAOS                                 | 1 (+)                                |
| VAS-FA                                                | Repo 2018           | LEFS                                 | 1 (+)                                |
| VAS-FA                                                | Repo 2018           | 15D index                            | 2 (+)                                |
| WOMAC ver 3.0 ankle/foot (index score)                | Ponkilainen 2019    | LEFS                                 | 1 (-)                                |
| WOMAC ver 3.0 ankle/foot (index score)                | Ponkilainen 2019    | VAS-FA                               | 1 (-)                                |
| WOMAC ver 3.0 ankle/foot (index score)                | Ponkilainen 2019    | 15D index                            | 2 (-)                                |
| WOMAC ver 3.0 ankle/foot (physical function subscale) | Ponkilainen 2019    | LEFS                                 | 1 (-)                                |

<sup>1</sup> foot and ankle

Abbreviations:

+ = positive correlation

- = negative correlation

AAOS-FAOQ = American Academy of Orthopaedic Surgeons Foot and Ankle Outcomes Questionnaire

ADL = activities of daily living

A-FORM = Ankle Fracture Outcome of Rehabilitation Measure

CAT = Computer Adaptive Test

DRI = Disability Rating Index

FAAM = Foot and Ankle Ability Measure

FAOS = Foot and Ankle Outcome Score

GSRF = Global Self-Rated Scale

LE = lower extremity

LEFS = Lower Extremity Functional Scale

MAQ = Munich Ankle Questionnaire

MCS = Mental Component Score

MOxFQ = Manchester-Oxford Foot Questionnaire

OMAS = Olerud-Molander Ankle Score

PCS = Physical Component Score

PF = physical function

PROMIS = Patient-Reported Outcomes Measurement Information System

QoL = quality of life

ROM = range of motion

SEFAS = Self-reported Foot and Ankle Score

SMFA = Short Musculoskeletal Function Assessment

TEFTOM = Trauma Expectation Factor Trauma Outcome Measure

VAS = Visual Analogue Scale

VAS-FA = Visual Analogue Scale Foot and Ankle

WOMAC = Western Ontario and McMaster Universities Osteoarthritis Index
