# Supplementary material for: Ankle fractures: a systematic review of patient-reported outcome measures and their measurement properties
Source: Springer Nature journal article supplement (doi:10.1007/s11136-022-03166-3), 2022-06-18
Supplement: MOESM4 [file 23181114]

**Article title**

Ankle Fractures: A Systematic Review of Patient Reported Outcome Measures and their measurement properties

**Journal name**

Quality of Life Research

**Author information**

Michael Quan Nguyen<sup>1,2</sup>, Ingvild Dalen<sup>2,3</sup>, Marjolein Memelink Iversen<sup>4,5</sup>, Knut Harboe<sup>1,6</sup>, Aksel Paulsen<sup>1,7</sup>

<sup>1</sup>Department of Orthopedic Surgery, Stavanger University Hospital, Helse Stavanger HF.

<sup>2</sup>Department of Quality and Health Technology, Faculty of Health Sciences, University of Stavanger.

<sup>3</sup>Department of Research, Stavanger University Hospital, Helse Stavanger HF.

<sup>4</sup>Centre on Patient-reported Outcomes, Department of Research and Development, Haukeland University Hospital, Helse Bergen HF.

<sup>5</sup>Department of Health and Caring Sciences, Faculty of Health and Social Sciences, Western Norway University of Applied Sciences.

<sup>6</sup>Department of Clinical Medicine, Faculty of Medicine, University of Bergen.

<sup>7</sup>Department of Public Health, Faculty of Health Sciences, University of Stavanger.

**Corresponding author:**

Michael Quan Nguyen

E-mail: n.michael.quan@gmail.com

ORCID: 0000-0003-0270-9518

**Online Resource 4** Characteristics of the comparator instruments

| <b>PROM</b>                                                                                                     | <b>Reference</b>            | <b>Construct</b>                                             | <b>Target population</b>                                         | <b>(Sub)scale(s) (number of items)</b>                                                                                                                        | <b>Response options</b>                          | <b>Range of scores/scoring</b>                                                            |
|-----------------------------------------------------------------------------------------------------------------|-----------------------------|--------------------------------------------------------------|------------------------------------------------------------------|---------------------------------------------------------------------------------------------------------------------------------------------------------------|--------------------------------------------------|-------------------------------------------------------------------------------------------|
| 15D                                                                                                             | Ponkilainen 2019, Repo 2018 | General health                                               | General, adults                                                  | 15 domains / 15 items                                                                                                                                         | 1-5                                              | Descriptive health profile or index based on utility weights: 0 (dead) - 1 (full "HrQoL") |
| American Academy of Orthopaedic Surgeons foot and ankle outcomes questionnaire, the global foot and ankle scale | Suk 2013, Fang 2020         | Symptoms and functional status related to the foot and ankle | Foot and ankle problems                                          | 1 scale (the global foot and ankle scale) / 20 items. Pain (9) + function (6) + stiffness and swelling (2) + giving away (3). The shoe comfort scale: 5 items | Global foot and ankle scale: 1-3, 1-5, 1-6, 1-7. | 0-100% (best)                                                                             |
| Disability Rating Index                                                                                         | McKeown 2021                | Physical function (disability)                               | Patients suffering from pain in the low back, neck and shoulders | 12 items                                                                                                                                                      | VAS 0-100mm                                      | Index: 0 (best) - 100 (worst)                                                             |
| EQ-5D-3L                                                                                                        | Garratt 2018, Lash 2002     | General health                                               | Wide range of illnesses                                          | 5 domains (mobility, self-care, usual activities, pain/discomfort and anxiety/depression) / 5 items                                                           | 1-3                                              | Health profile or EQ-5D-index with value set                                              |
| EQ-5D-5L                                                                                                        | McKeown 2021                | General health                                               | Wide range of illnesses                                          | 5 domains (mobility, self-care, usual activities, pain/discomfort and anxiety/depression) / 5 items                                                           | 1-5                                              | Health profile or EQ-5D-index with value set                                              |

| <b>PROM</b>                          | <b>Reference</b>                                                        | <b>Construct</b>                                                 | <b>Target population</b>                                               | <b>(Sub)scale(s) (number of items)</b>                                                                                                                   | <b>Response options</b>                | <b>Range of scores/scoring</b>                                 |
|--------------------------------------|-------------------------------------------------------------------------|------------------------------------------------------------------|------------------------------------------------------------------------|----------------------------------------------------------------------------------------------------------------------------------------------------------|----------------------------------------|----------------------------------------------------------------|
| Foot and Ankle Outcome Score         | Büker 2017, Nilsson 2013, Greve 2018, Suk 2013, Gausden 2018, Fang 2020 | Symtoms and functional limitations related to the foot and ankle | Foot and ankle conditions                                              | 5 subscales / 42 items. Symptoms/stiffness (5+2), pain (9), ADL (17), function in sports and recreational activites (5), foot and ankle-related QoL (4). | 0-4                                    | Raw score of each subscale converted to 0 (worst) - 100 (best) |
| Foot and Ankle Ability Measure       | Greve 2018, Turhan 2017                                                 | Physical function (disability)                                   | Musculoskeletal disorders of the feet and ankle                        | 2 subscales / ADL 21 items + sports 8 items                                                                                                              | 0-4                                    | ADL 0-84 (worst), sports 0-32 (worst)                          |
| Global self-rated function           | Büker 2017, Nilsson 2013                                                | Ankle function                                                   | General                                                                | 1 item                                                                                                                                                   | Very good, good, fair, poor, very poor |                                                                |
| Linear analgoue scale                | Olerud-Molander 1984                                                    | Ankle function                                                   | General                                                                | 1 item                                                                                                                                                   | 15 cm long linear analogue scale       | 0-100 (best)                                                   |
| Lower Extremity Scale                | Garratt 2018, Ponkilainen 2019, Repo 2018                               | Physical function (disability) in ADL                            | Musculoskeletal conditions or disorders in lower limb                  | 20 items                                                                                                                                                 | 0-4                                    | 0 (worst) - 80 (best)                                          |
| Manchester Oxford Foot Questionnaire | McKeown 2021                                                            | Recovery in individuals with foot and ankle conditions           | Patients undergoing surgery on different regions of the foot and ankle | 3 subscales / 16 items or summarized score (index). Walking/standing (7), pain (5), social interaction (4).                                              | 0-4                                    | Converted to 0 (best) -100 (worst)                             |

| <b>PROM</b>                        | <b>Reference</b>                     | <b>Construct</b>               | <b>Target population</b>                                                            | <b>(Sub)scale(s) (number of items)</b> | <b>Response options</b>                                                                                                                           | <b>Range of scores/scoring</b>                                   |
|------------------------------------|--------------------------------------|--------------------------------|-------------------------------------------------------------------------------------|----------------------------------------|---------------------------------------------------------------------------------------------------------------------------------------------------|------------------------------------------------------------------|
| Olerud-Molander Ankle Score        | Garratt 2018, Gausden 2018, Lin 2009 | Physical disability            | Follow-up of ankle fracture                                                         | 1 scale / 9 items                      | Pain (0-25), stiffness (0-10), swelling (0-10), stair climbing (0-10), running (0-5), jumping (0-5), use of supports (0-10), work/activity (0-20) | 0 (worst) - 100 (best)                                           |
| Self-Reported Foot and Ankle Score | Garratt 2018                         | Pain, function, other          | Osteoarthritis and inflammatory arthritis of the ankle and outcome of ankle surgery | 12 items                               | 0-4                                                                                                                                               | 12-60 (worst)                                                    |
| SF-12 Mental Component score       | Shah 2007                            | Mental health                  | General                                                                             | 8 subscales / 12 items                 | Mix: binary, 1-3, 1-5, 1-6                                                                                                                        | Norm based, standardized mean score 50 SD 10. Range 0-100 (best) |
| SF-12 Physical Component score     | Shah 2007, Turhan 2017               | Physical health                | General                                                                             | 8 subscales / 12 items                 | Mix: binary, 1-3, 1-5, 1-6                                                                                                                        | Norm based, standardized mean score 50 SD 10. Range 0-100 (best) |
| SF-36                              | Obremskey 2007, Ponzer 1999          | Physical and mental health     | General                                                                             | 8 subscales / 36 items                 | Mix: binary, 1-3, 1-5, 1-6                                                                                                                        | Each subscales: 0-100 (best)                                     |
| SF-36 physical functioning         | Garratt 2018, Suk 2013, Fang 2020    | Physical function (disability) | General                                                                             | 10 items                               | 1-3                                                                                                                                               | 0 -100 (best)                                                    |

| <b>PROM</b>                            | <b>Reference</b> | <b>Construct</b>                      | <b>Target population</b> | <b>(Sub)scale(s) (number of items)</b>                    | <b>Response options</b>    | <b>Range of scores/scoring</b>                                   |
|----------------------------------------|------------------|---------------------------------------|--------------------------|-----------------------------------------------------------|----------------------------|------------------------------------------------------------------|
| SF-36 Mental Component Score           | Zelle 2017       | Mental health                         | General                  | 8 subscales / 35 items                                    | Mix: binary, 1-3, 1-5, 1-6 | Norm based, standardized mean score 50 SD 10. Range 0-100 (best) |
| SF-36 Physical Component Score         | Zelle 2017       | Physical health                       | General                  | 8 subscales / 35 items                                    | Mix: binary, 1-3, 1-5, 1-6 | Norm based, standardized mean score 50 SD 10. Range 0-100 (best) |
| Visual Analogue Scale                  | Ponzer 1999      | Mental/physical injury related health |                          | 1 item                                                    | 100mm long line            | 0-100 (worst)                                                    |
| Visual Analogue Scale – Foot and Ankle | Ponkilainen 2019 | Not defined                           | Foot and ankle patients  | 3 subscales (function, pain, other complaints) / 20 items | VAS 0-100mm                | 0 - 100 (best)                                                   |

Abbreviations:

ADL = Activities of daily living

HrQoL = Health-related quality of life

SD = Standard deviation

SF = Short form

VAS = Visual Analogue Scale
