# Supplementary material for: Ankle fractures: a systematic review of patient-reported outcome measures and their measurement properties
Source: Springer Nature journal article supplement (doi:10.1007/s11136-022-03166-3), 2022-06-18
Supplement: MOESM5 [file 23181114]

**Article title**

Ankle Fractures: A Systematic Review of Patient Reported Outcome Measures and their measurement properties

**Journal name**

Quality of Life Research

**Author information**

Michael Quan Nguyen<sup>1,2</sup>, Ingvild Dalen<sup>2,3</sup>, Marjolein Memelink Iversen<sup>4,5</sup>, Knut Harboe<sup>1,6</sup>, Aksel Paulsen<sup>1,7</sup>

<sup>1</sup>Department of Orthopedic Surgery, Stavanger University Hospital, Helse Stavanger HF.

<sup>2</sup>Department of Quality and Health Technology, Faculty of Health Sciences, University of Stavanger.

<sup>3</sup>Department of Research, Stavanger University Hospital, Helse Stavanger HF.

<sup>4</sup>Centre on Patient-reported Outcomes, Department of Research and Development, Haukeland University Hospital, Helse Bergen HF.

<sup>5</sup>Department of Health and Caring Sciences, Faculty of Health and Social Sciences, Western Norway University of Applied Sciences.

<sup>6</sup>Department of Clinical Medicine, Faculty of Medicine, University of Bergen.

<sup>7</sup>Department of Public Health, Faculty of Health Sciences, University of Stavanger.

**Corresponding author:**

Michael Quan Nguyen

E-mail: n.michael.quan@gmail.com

ORCID: 0000-0003-0270-9518

**Online Resource 5** Summary of findings table

**AMERICAN ACADEMY OF ORTHOPAEDIC SURGEONS FOOT AND ANKLE OUTCOMES QUESTIONNAIRE**

| Reference           | Content validity       |   | Structural validity |   | Internal consistency |   | Cross-cultural validity |   | Reliability |   | Measurement error |   | Criterion validity |   | H testing for construct validity |          | Responsiveness                                                                   |   |  |  |
|---------------------|------------------------|---|---------------------|---|----------------------|---|-------------------------|---|-------------|---|-------------------|---|--------------------|---|----------------------------------|----------|----------------------------------------------------------------------------------|---|--|--|
|                     | MQ                     | R | MQ                  | R | MQ                   | R | MQ                      | R | MQ          | R | MQ                | R | MQ                 | R | MQ                               | R        | MQ                                                                               | R |  |  |
| Zelle 2017          | D                      | + |                     |   |                      |   |                         |   |             |   |                   |   |                    |   | A                                | H met: 4 |                                                                                  |   |  |  |
| Summarized results  | Only comprehensibility |   |                     |   |                      |   |                         |   |             |   |                   |   |                    |   |                                  |          | H met: 4                                                                         |   |  |  |
| Overall rating      | NA                     |   |                     |   |                      |   |                         |   |             |   |                   |   |                    |   |                                  |          | Sufficient                                                                       |   |  |  |
| Quality of evidence | NA                     |   |                     |   |                      |   |                         |   |             |   |                   |   |                    |   |                                  |          | Low; downgraded due to risk of bias and total sample size less than 100 (n = 83) |   |  |  |

**ANKLE FRACTURE OUTCOME OF REHABILITATION**

| Reference           | Content validity                                                     |   | Structural validity |   | Internal consistency |   | Cross-cultural validity |   | Reliability |   | Measurement error |   | Criterion validity |   | Hypothesis testing for construct validity |   | Responsiveness |   |
|---------------------|----------------------------------------------------------------------|---|---------------------|---|----------------------|---|-------------------------|---|-------------|---|-------------------|---|--------------------|---|-------------------------------------------|---|----------------|---|
|                     | MQ                                                                   | R | MQ                  | R | MQ                   | R | MQ                      | R | MQ          | R | MQ                | R | MQ                 | R | MQ                                        | R | MQ             | R |
| McPhail 2014        | I                                                                    | + |                     |   |                      |   |                         |   |             |   |                   |   |                    |   |                                           |   |                |   |
| Summarized results  | NA                                                                   |   |                     |   |                      |   |                         |   |             |   |                   |   |                    |   |                                           |   |                |   |
| Overall rating      | Sufficient                                                           |   |                     |   |                      |   |                         |   |             |   |                   |   |                    |   |                                           |   |                |   |
| Quality of evidence | Very low; PROM development study inadequate, only reviewers' ratings |   |                     |   |                      |   |                         |   |             |   |                   |   |                    |   |                                           |   |                |   |

**FOOT AND ANKLE ABILITY MEASURE**

| Reference           | Content validity |   | Structural validity |   | Internal consistency |   | Cross-cultural validity |   | Reliability |   | Measurement error |   | Criterion validity |   | H testing for construct validity |    | Responsiveness |   |
|---------------------|------------------|---|---------------------|---|----------------------|---|-------------------------|---|-------------|---|-------------------|---|--------------------|---|----------------------------------|----|----------------|---|
|                     | MQ               | R | MQ                  | R | MQ                   | R | MQ                      | R | MQ          | R | MQ                | R | MQ                 | R | MQ                               | R  | MQ             | R |
| Schultz 2020        |                  |   |                     |   |                      |   |                         |   |             |   |                   |   |                    |   | I                                | NA |                |   |
| Summarized results  |                  |   |                     |   |                      |   |                         |   |             |   |                   |   |                    |   |                                  | NA |                |   |
| Overall rating      |                  |   |                     |   |                      |   |                         |   |             |   |                   |   |                    |   |                                  | ?  |                |   |
| Quality of evidence |                  |   |                     |   |                      |   |                         |   |             |   |                   |   |                    |   |                                  | NA |                |   |

**LOWER EXTREMITY FUNCTIONAL SCALE**

| Reference           | Content validity       |   | Structural validity |                                        | Internal consistency |               | Cross-cultural validity |   | Reliability                           |               | Measurement error         |               | Criterion validity |   | H testing for construct validity                    |                        | Responsiveness |                                |
|---------------------|------------------------|---|---------------------|----------------------------------------|----------------------|---------------|-------------------------|---|---------------------------------------|---------------|---------------------------|---------------|--------------------|---|-----------------------------------------------------|------------------------|----------------|--------------------------------|
|                     | MQ                     | R | MQ                  | R                                      | MQ                   | R             | MQ                      | R | MQ                                    | R             | MQ                        | R             | MQ                 | R | MQ                                                  | R                      | MQ             | R                              |
| Garratt 2018        |                        |   | V                   | (+) CFA: CFI 0.99/TLI 0.99/RMSEA 0.091 | V                    | (+) Ca = 0.96 |                         |   | A                                     | (+) ICC: 0.91 | A                         | (?) SDC: 12.5 |                    |   | A                                                   | H met: 7<br>H unmet: 1 |                |                                |
| Garratt 2018        |                        |   |                     |                                        |                      |               |                         |   |                                       |               |                           |               |                    |   | D                                                   | H unmet: 1             |                |                                |
| Lin 2009 (1)        |                        |   | V                   | (-)                                    | V                    | (?)           |                         |   |                                       |               |                           |               |                    |   |                                                     |                        |                |                                |
| Lin 2009 (2)        |                        |   |                     |                                        |                      |               |                         |   |                                       |               |                           |               |                    |   | V                                                   | H met: 2               |                |                                |
| Lin 2009 (3)        |                        |   |                     |                                        |                      |               |                         |   |                                       |               |                           |               |                    |   |                                                     |                        | D              | H met: 2<br>AUC: 0.79 and 0.84 |
| Repo 2017           | D                      | + | A                   | ?                                      | I                    | ?             |                         |   | A                                     | (+) ICC 0.93  | A                         | ?             |                    |   | A                                                   | H met: 4               |                |                                |
| Repo 2019           |                        |   | A                   | -                                      |                      |               |                         |   |                                       |               |                           |               |                    |   |                                                     |                        |                |                                |
| Summarized results  | Only comprehensibility |   |                     | +/-                                    |                      | ?             |                         |   | ICC: 0.91-0.93                        |               | SDC: 12.5<br>MIC: unknown |               |                    |   | H met: 13<br>H unmet: 2<br>Sufficient 87% confirmed |                        | H met: 2       |                                |
| Overall rating      | NA                     |   |                     | Inconsistent                           |                      | Indeterminate |                         |   | Sufficient                            |               | Indeterminate             |               |                    |   | Sufficient 87% confirmed                            |                        | Sufficient     |                                |
| Quality of evidence | NA                     |   |                     | NA                                     |                      | NA            |                         |   | High; Two studies of adequate quality |               | NA                        |               |                    |   | High                                                |                        | Low            |                                |

**THE MUNICH ANKLE QUESTIONNAIRE**

| Reference           | Content validity |   | Structural validity |   | Internal consistency |     | Cross-cultural validity |   | Reliability |                    | Measurement error |   | Criterion validity |   | H testing for construct validity |            | Responsiveness |                                                            |
|---------------------|------------------|---|---------------------|---|----------------------|-----|-------------------------|---|-------------|--------------------|-------------------|---|--------------------|---|----------------------------------|------------|----------------|------------------------------------------------------------|
|                     | MQ               | R | MQ                  | R | MQ                   | R   | MQ                      | R | MQ          | R                  | MQ                | R | MQ                 | R | MQ                               | R          | MQ             | R                                                          |
| Greve 2018          |                  |   |                     |   | D                    | (?) |                         |   | I           | (+) ICC: 0.77-0.80 |                   |   |                    |   | A                                | H met: 3   | A              | H met: 3; SCC pain, work/daily and movement/ROM: 0.42-0.47 |
| Summarized results  |                  |   |                     |   | ?                    |     |                         |   |             | ICC: 0.77-0.80     |                   |   |                    |   |                                  | H met: 3   |                | H met: 3                                                   |
| Overall rating      |                  |   |                     |   | Indeterminate        |     |                         |   |             | Sufficient         |                   |   |                    |   |                                  | Sufficient |                | Sufficient                                                 |
| Quality of evidence |                  |   |                     |   | NA                   |     |                         |   |             | Very low           |                   |   |                    |   |                                  | Moderate   |                | Moderate                                                   |

**OLERUD MOLANDER ANKLE SCORE**

| Reference            | Content validity       |   | Structural validity       |                                        | Internal consistency                                 |                     | Cross-cultural validity |   | Reliability                                  |                | Measurement error                                                                                               |                                     | Criterion validity |   | H testing for construct validity           |                        | Responsiveness           |   |
|----------------------|------------------------|---|---------------------------|----------------------------------------|------------------------------------------------------|---------------------|-------------------------|---|----------------------------------------------|----------------|-----------------------------------------------------------------------------------------------------------------|-------------------------------------|--------------------|---|--------------------------------------------|------------------------|--------------------------|---|
|                      | MQ                     | R | MQ                        | R                                      | MQ                                                   | R                   | MQ                      | R | MQ                                           | R              | MQ                                                                                                              | R                                   | MQ                 | R | MQ                                         | R                      | MQ                       | R |
| Büker 2017           |                        |   |                           |                                        | V                                                    | (+) Ca = 0.76       |                         |   | I                                            | (+) ICC: 0.942 |                                                                                                                 |                                     |                    |   | A                                          | H met: 6               |                          |   |
| Lash 2002            |                        |   |                           |                                        |                                                      |                     |                         |   |                                              |                |                                                                                                                 |                                     |                    |   | I                                          | NA                     |                          |   |
| Garratt 2018         |                        |   | V                         | (+) CFA: CFI 0.99/TLI 0.98/RMSEA 0.087 | V                                                    | (+) Ca = 0.82       |                         |   | A                                            | (+) ICC: 0.92  | A                                                                                                               | (-) SDC: 19.0 MIC: 9.7 <sup>a</sup> |                    |   | A                                          | H met: 6<br>H unmet: 2 |                          |   |
| Garratt 2018         |                        |   |                           |                                        |                                                      |                     |                         |   |                                              |                |                                                                                                                 |                                     |                    |   | D                                          | H unmet: 1             |                          |   |
| McKeown 2021         |                        |   | A                         | (?)                                    | V                                                    | (+) Ca total = 0.76 |                         |   |                                              |                |                                                                                                                 |                                     |                    |   | A                                          | H met: 8<br>H unmet: 4 |                          |   |
| Nilsson 2013 (1)     |                        |   |                           |                                        | V                                                    | (+) Ca = 0.76       |                         |   | D                                            | (+) ICC: 0.94  | D                                                                                                               | (-) SDC: 12.0 MIC: 9.7 <sup>a</sup> |                    |   |                                            |                        |                          |   |
| Nilsson 2013 (2)     |                        |   |                           |                                        |                                                      |                     |                         |   |                                              |                |                                                                                                                 |                                     |                    |   | I                                          | NA                     |                          |   |
| Nilsson 2013 (3)     |                        |   |                           |                                        |                                                      |                     |                         |   |                                              |                |                                                                                                                 |                                     |                    |   | A                                          | H met: 5               |                          |   |
| Olerud-Molander 1984 |                        |   |                           |                                        |                                                      |                     |                         |   |                                              |                |                                                                                                                 |                                     |                    |   | I                                          | NA                     |                          |   |
| Ponzer 1999          |                        |   |                           |                                        |                                                      |                     |                         |   |                                              |                |                                                                                                                 |                                     |                    |   | D                                          | H met: 8<br>H unmet: 2 |                          |   |
| Shah 2007            |                        |   |                           |                                        |                                                      |                     |                         |   |                                              |                |                                                                                                                 |                                     |                    |   | A                                          | H met: 1<br>H unmet: 1 |                          |   |
| Turhan 2017          | D                      | + |                           |                                        | V                                                    | (+) Ca = 0.84       |                         |   | I                                            | (+) ICC: 0.98  | I                                                                                                               | (+) SDC: 9.1 MIC: 9.7 <sup>a</sup>  |                    |   | A                                          | H met: 2<br>H unmet: 2 |                          |   |
| Summarized results   | Only comprehensibility |   | Unidimensional            |                                        | Ca: 0.76-0.84                                        |                     |                         |   | ICC: 0.92-0.98                               |                | SDC: 9.1-19.0 MIC 9.7 <sup>a</sup>                                                                              |                                     |                    |   | H met: 36<br>H unmet: 12                   |                        | Sufficient 75% confirmed |   |
| Overall rating       | NA                     |   | Sufficient                |                                        | Sufficient                                           |                     |                         |   | Sufficient                                   |                | Insufficient                                                                                                    |                                     |                    |   |                                            |                        |                          |   |
| Quality of evidence  | NA                     |   | High; one very good study |                                        | High; multiple very good studies; consistent results |                     |                         |   | Moderate; only one study of adequate quality |                | Very low; only one study of adequate quality, one MIC, and indirectness (follow-up time 4.3 years vs. 16 weeks) |                                     |                    |   | High; multiple studies of adequate quality |                        |                          |   |

**PROMIS LE CAT**

| Reference           | Content validity |   | Structural validity |   | Internal consistency |   | Cross-cultural validity |   | Reliability |   | Measurement error |   | Criterion validity |   | H testing for construct validity |                        | Responsiveness |   |  |
|---------------------|------------------|---|---------------------|---|----------------------|---|-------------------------|---|-------------|---|-------------------|---|--------------------|---|----------------------------------|------------------------|----------------|---|--|
|                     | MQ               | R | MQ                  | R | MQ                   | R | MQ                      | R | MQ          | R | MQ                | R | MQ                 | R | MQ                               | R                      | MQ             | R |  |
| Gausden 2018        |                  |   |                     |   |                      |   |                         |   |             |   |                   |   |                    |   | D                                | H met: 5<br>H unmet: 1 |                |   |  |
| Summarized results  |                  |   |                     |   |                      |   |                         |   |             |   |                   |   |                    |   |                                  | H met: 5<br>H unmet: 1 |                |   |  |
| Overall rating      |                  |   |                     |   |                      |   |                         |   |             |   |                   |   |                    |   |                                  | Sufficient             |                |   |  |
| Quality of evidence |                  |   |                     |   |                      |   |                         |   |             |   |                   |   |                    |   |                                  | Low                    |                |   |  |

**PROMIS PF VER 1.2 CAT**

| Reference           | Content validity |   | Structural validity |   | Internal consistency |   | Cross-cultural validity |   | Reliability |   | Measurement error |   | Criterion validity |   | H testing for construct validity |                        | Responsiveness |   |  |
|---------------------|------------------|---|---------------------|---|----------------------|---|-------------------------|---|-------------|---|-------------------|---|--------------------|---|----------------------------------|------------------------|----------------|---|--|
|                     | MQ               | R | MQ                  | R | MQ                   | R | MQ                      | R | MQ          | R | MQ                | R | MQ                 | R | MQ                               | R                      | MQ             | R |  |
| Gausden 2018        |                  |   |                     |   |                      |   |                         |   |             |   |                   |   |                    |   | D                                | H met: 4<br>H unmet: 2 |                |   |  |
| Summarized results  |                  |   |                     |   |                      |   |                         |   |             |   |                   |   |                    |   |                                  | H met: 4<br>H unmet: 2 |                |   |  |
| Overall rating      |                  |   |                     |   |                      |   |                         |   |             |   |                   |   |                    |   |                                  | Insufficient           |                |   |  |
| Quality of evidence |                  |   |                     |   |                      |   |                         |   |             |   |                   |   |                    |   |                                  | Low                    |                |   |  |

**SELF-REPORTED FOOT AND ANKLE SCORE**

| Reference           | Content validity             |   | Structural validity |                                        | Internal consistency |                       | Cross-cultural validity |   | Reliability                                  |               | Measurement error                                                  |                                  | Criterion validity |   | H testing for construct validity                                    |                        | Responsiveness |   |  |
|---------------------|------------------------------|---|---------------------|----------------------------------------|----------------------|-----------------------|-------------------------|---|----------------------------------------------|---------------|--------------------------------------------------------------------|----------------------------------|--------------------|---|---------------------------------------------------------------------|------------------------|----------------|---|--|
|                     | MQ                           | R | MQ                  | R                                      | MQ                   | R                     | MQ                      | R | MQ                                           | R             | MQ                                                                 | R                                | MQ                 | R | MQ                                                                  | R                      | MQ             | R |  |
| Erichsen 2021 (1)   | I                            | + |                     |                                        |                      |                       |                         |   |                                              |               |                                                                    |                                  |                    |   |                                                                     |                        |                |   |  |
| Erichsen 2021 (2)   |                              |   |                     |                                        | V                    | (+) C $\alpha$ = 0.93 |                         |   |                                              |               |                                                                    |                                  |                    |   | D                                                                   | H unmet: 1             |                |   |  |
| Erichsen 2021 (3)   |                              |   |                     |                                        |                      |                       |                         |   | I                                            | (+) ICC: 0.93 | I                                                                  | (-) SDC: 6.8 MIC: 5              |                    |   |                                                                     |                        |                |   |  |
| Garratt 2018        |                              |   | V                   | (+) CFA: CFI 0.99/TLI 0.99/RMSEA 0.063 | V                    | (+) C $\alpha$ = 0.93 |                         |   | A                                            | (+) ICC: 0.93 | A                                                                  | (-) SDC: 6.6 MIC: 5 <sup>b</sup> |                    |   | A                                                                   | H met: 6<br>H unmet: 2 |                |   |  |
| Summarized results  | Only comprehensibility rated |   | Unidimensional      |                                        | C $\alpha$ = 0.93    |                       |                         |   | ICC: 0.93                                    |               | SDC: 6.6-6.8 MIC: 5                                                |                                  |                    |   | H met: 6<br>H unmet: 3                                              |                        |                |   |  |
| Overall rating      | NA                           |   | Sufficient          |                                        | Sufficient           |                       |                         |   | Sufficient                                   |               | Insufficient                                                       |                                  |                    |   | 75% confirmed (based on at least adequate MQ: H met: 6, H unmet: 2) |                        |                |   |  |
| Quality of evidence | NA                           |   | High                |                                        | High                 |                       |                         |   | Moderate; only one study of adequate quality |               | Very low; MIC based on only one study and not adequately performed |                                  |                    |   | Moderate                                                            |                        |                |   |  |

**SHORT MUSCULOSKELETAL FUNCTIONAL ASSESSMENT**

| Reference           | Content validity |   | Structural validity |   | Internal consistency |   | Cross-cultural validity |   | Reliability |   | Measurement error |   | Criterion validity |   | H testing for construct validity |   | Responsiveness |   |  |
|---------------------|------------------|---|---------------------|---|----------------------|---|-------------------------|---|-------------|---|-------------------|---|--------------------|---|----------------------------------|---|----------------|---|--|
|                     | MQ               | R | MQ                  | R | MQ                   | R | MQ                      | R | MQ          | R | MQ                | R | MQ                 | R | MQ                               | R | MQ             | R |  |
| Obremskey 2007      |                  |   |                     |   |                      |   |                         |   |             |   |                   |   |                    |   | I                                |   | H met: 8       |   |  |
| Summarized results  |                  |   |                     |   |                      |   |                         |   |             |   |                   |   |                    |   |                                  |   | H met: 8       |   |  |
| Overall rating      |                  |   |                     |   |                      |   |                         |   |             |   |                   |   |                    |   |                                  |   | Sufficient     |   |  |
| Quality of evidence |                  |   |                     |   |                      |   |                         |   |             |   |                   |   |                    |   |                                  |   | Very low       |   |  |

**TRAUMA EXPECTATION FACTOR OUTCOMES MEASURE**

| Reference           | Content validity |   | Structural validity                                                  |   | Internal consistency |               | Cross-cultural validity |   | Reliability |                    | Measurement error |   | Criterion validity |   | H testing for construct validity |   | Responsiveness           |   |               |
|---------------------|------------------|---|----------------------------------------------------------------------|---|----------------------|---------------|-------------------------|---|-------------|--------------------|-------------------|---|--------------------|---|----------------------------------|---|--------------------------|---|---------------|
|                     | MQ               | R | MQ                                                                   | R | MQ                   | R             | MQ                      | R | MQ          | R                  | MQ                | R | MQ                 | R | MQ                               | R | MQ                       | R |               |
| Suk 2013            | I                |   | +/-                                                                  |   | I                    | ?             |                         |   | I           | (+) ICC: 0.92-0.96 |                   |   |                    |   | I                                |   | H met: 22<br>H unmet: 2  | I | ?             |
| Fang 2020           |                  |   |                                                                      |   | I                    | ?             |                         |   | I           | (+) ICC: 0.93-0.94 |                   |   |                    |   | I                                |   | H met: 3<br>H unmet: 13  | I | ?             |
| Summarized results  |                  |   |                                                                      |   |                      | ?             |                         |   |             | ICC: 0.92-0.96     |                   |   |                    |   |                                  |   | H met: 25<br>H unmet: 15 |   | ?             |
| Overall rating      |                  |   | Inconsistent                                                         |   |                      | Indeterminate |                         |   |             | Sufficient         |                   |   |                    |   |                                  |   | Insufficient             |   | Indeterminate |
| Quality of evidence |                  |   | Very low: PROM development study inadequate. only reviewer's ratings |   |                      | NA            |                         |   |             | Low                |                   |   |                    |   |                                  |   | Low                      |   | NA            |

**VISUAL ANALOGUE SCALE FOOT AND ANKLE**

| Reference           | Content validity |   | Structural validity    |   | Internal consistency |   | Cross-cultural validity |   | Reliability |               | Measurement error |   | Criterion validity |   | H testing for construct validity |   | Responsiveness |   |  |
|---------------------|------------------|---|------------------------|---|----------------------|---|-------------------------|---|-------------|---------------|-------------------|---|--------------------|---|----------------------------------|---|----------------|---|--|
|                     | MQ               | R | MQ                     | R | MQ                   | R | MQ                      | R | MQ          | R             | MQ                | R | MQ                 | R | MQ                               | R | MQ             | R |  |
| Repo 2018           | D                | + | D                      | ? | I                    | ? |                         |   | A           | (+) ICC: 0.97 |                   |   |                    |   | I                                |   | H met: 2       |   |  |
| Summarized results  |                  |   | Only comprehensibility |   | ?                    |   |                         |   |             | ICC: 0.97     |                   |   |                    |   |                                  |   | H met: 2       |   |  |
| Overall rating      |                  |   | NA                     |   | Indeterminate        |   |                         |   |             | Sufficient    |                   |   |                    |   |                                  |   | Sufficient     |   |  |
| Quality of evidence |                  |   | NA                     |   | NA                   |   |                         |   |             | Moderate      |                   |   |                    |   |                                  |   | Very low       |   |  |

**WESTERN ONTARIO AND MCMASTER UNIVERSITIES OSTEOARTHRITIS INDEX VERSION 3.0 FOOT/ANKLE**

| Reference            | Content validity |   | Structural validity |   | Internal consistency |                                                                                                        | Cross-cultural validity |   | Reliability |   | Measurement error |   | Criterion validity |   | H testing for construct validity |            | Responsiveness |   |
|----------------------|------------------|---|---------------------|---|----------------------|--------------------------------------------------------------------------------------------------------|-------------------------|---|-------------|---|-------------------|---|--------------------|---|----------------------------------|------------|----------------|---|
|                      | MQ               | R | MQ                  | R | MQ                   | R                                                                                                      | MQ                      | R | MQ          | R | MQ                | R | MQ                 | R | MQ                               | R          | MQ             | R |
| Ponkilainen 2019 (1) |                  |   |                     |   | D                    | (+)<br>C $\alpha$ -pain = 0.95<br>C $\alpha$ -stiffness = 0.86<br>C $\alpha$ -physical function = 0.98 |                         |   |             |   |                   |   |                    |   | A                                | H met: 1   |                |   |
| Ponkilainen 2019 (2) |                  |   |                     |   |                      |                                                                                                        |                         |   |             |   |                   |   |                    |   | V                                | H met: 2   |                |   |
| Ponkilainen 2019 (3) |                  |   |                     |   |                      |                                                                                                        |                         |   |             |   |                   |   |                    |   | I                                | H met: 1   |                |   |
| Summarized results   |                  |   |                     |   |                      | NA                                                                                                     |                         |   |             |   |                   |   |                    |   |                                  | H met: 4   |                |   |
| Overall rating       |                  |   |                     |   |                      | NA; lack of evidence on structural validity                                                            |                         |   |             |   |                   |   |                    |   |                                  | Sufficient |                |   |
| Quality of evidence  |                  |   |                     |   |                      | NA                                                                                                     |                         |   |             |   |                   |   |                    |   |                                  | High       |                |   |

<sup>a</sup> MIC from study of McKeown et al.

<sup>b</sup> MIC from study of Erichsen et al.

Abbreviations:

H = Hypothesis

MQ = methodological quality

R = rating

V = very good

A = adequate

D = doubtful

I = inadequate

? = indeterminate

+ = sufficient

- = insufficient

+/- = inconsistent

NA = not applicable

CFI = comparative fit index

TLI = Tucker-Lewis index

RMSEA = Root Mean Square Error of Approximation

C $\alpha$  = Cronbach's Alpha

ICC = intraclass correlation coefficient

SDC = smallest detectable change

MIC = minimal important change

PROMIS = Patient-Reported Outcomes Measurement Information System

CAT = Computer Adaptive Test

PF = Physical Function

LE = Lower Extremity

AUC = area under curve
