# Supplementary material for: Ankle fractures: a systematic review of patient-reported outcome measures and their measurement properties
Source: Springer Nature journal article supplement (doi:10.1007/s11136-022-03166-3), 2022-06-18
Supplement: MOESM6 [file 23181114]

**Article title**

Ankle Fractures: A Systematic Review of Patient Reported Outcome Measures and their measurement properties

**Journal name**

Quality of Life Research

**Author information**

Michael Quan Nguyen<sup>1,2</sup>, Ingvild Dalen<sup>2,3</sup>, Marjolein Memelink Iversen<sup>4,5</sup>, Knut Harboe<sup>1,6</sup>, Aksel Paulsen<sup>1,7</sup>

<sup>1</sup>Department of Orthopedic Surgery, Stavanger University Hospital, Helse Stavanger HF.

<sup>2</sup>Department of Quality and Health Technology, Faculty of Health Sciences, University of Stavanger.

<sup>3</sup>Department of Research, Stavanger University Hospital, Helse Stavanger HF.

<sup>4</sup>Centre on Patient-reported Outcomes, Department of Research and Development, Haukeland University Hospital, Helse Bergen HF.

<sup>5</sup>Department of Health and Caring Sciences, Faculty of Health and Social Sciences, Western Norway University of Applied Sciences.

<sup>6</sup>Department of Clinical Medicine, Faculty of Medicine, University of Bergen.

<sup>7</sup>Department of Public Health, Faculty of Health Sciences, University of Stavanger.

**Corresponding author:**

Michael Quan Nguyen

E-mail: n.michael.quan@gmail.com

ORCID: 0000-0003-0270-9518

**Online Resource 6** Table on interpretability

| Reference            | PROM                  | Distribution of scores in the population                                 | Missing (%) | Floor and ceiling effects | MIC                      |
|----------------------|-----------------------|--------------------------------------------------------------------------|-------------|---------------------------|--------------------------|
| Büker 2017           | OMAS                  | Mean 73 ± 23 (range 10-100)                                              | ?           | ?                         | ?                        |
| Erichsen 2021 (2)    | SEFAS                 | Mean 28 ± 9.6                                                            | ?           | 6 weeks: 22.4% (floor)    | Mean 5 ± 1.5             |
| Fang 2020            | TEFTOM                | TOM 12 months mean 34 ± 5.7                                              | ?           | ?                         | ?                        |
| Garratt 2018         | LEFS                  | Mean 67 ± 15                                                             | 4.2         | ?                         | ?                        |
| Garratt 2018         | OMAS                  | Mean 74 ± 25                                                             | 17.3        | ?                         | ?                        |
| Garratt 2018         | SEFAS                 | Mean 81 ± 19                                                             | 8.5         | ?                         | ?                        |
| Gausden 2018         | PROMIS LE CAT         | ?                                                                        | ?           | No                        | 3.7 (distribution-based) |
| Gausden 2018         | PROMIS PF ver 1.2 CAT | ?                                                                        | ?           | No                        | 4.3 (distribution-based) |
| Greve 2018           | MAQ                   | Mean 76 ± 19                                                             | ?           | No                        |                          |
| Lash 2002            | OMAS                  | Mean 71 ± 22                                                             | ?           | ?                         | ?                        |
| Lin 2009 (1)         | LEFS                  | Baseline: mean 31 ± 12;<br>4-6 w: mean 54 ± 13;<br>24-26 w: mean 69 ± 12 | 5.8         | No                        | ?                        |
| Lin 2009 (2)         | LEFS                  | 6 w: mean 51 ± 13;<br>26 w: mean 66 ± 12                                 | ?           | ?                         | ?                        |
| McKeown 2021         | OMAS                  | ?                                                                        | ?           | No                        | Mean 9.7 ± 15            |
| McPhail 2014         | A-FORM v1.0           | ?                                                                        | ?           | ?                         | ?                        |
| Nilsson 2013 (1)     | OMAS                  | First assessment mean 75 ± 19; second assessment mean 77 ± 18            | ?           | No                        | ?                        |
| Nilsson 2013 (2)     | OMAS                  | ?                                                                        | ?           | ?                         | ?                        |
| Nilsson 2013 (3)     | OMAS                  | Median 80 (IQR 25, range 30-100)                                         | ?           | No                        | ?                        |
| Obremskey 2007       | SMFA                  | Dysfunction index mean 17 ± 15; Bother index mean 18 ± 18                | < 5         | No                        | ?                        |
| Olerud-Molander 1984 | OMAS                  | ?                                                                        | ?           | ?                         | ?                        |

| Reference        | PROM                         | Distribution of scores in the population                                                           | Missing (%) | Floor and ceiling effects                                            | MIC |
|------------------|------------------------------|----------------------------------------------------------------------------------------------------|-------------|----------------------------------------------------------------------|-----|
| Ponkilainen 2019 | WOMAC version 3.0 foot/ankle | Index median 8 (IQR 22); Pain median 6 (IQR 16); Stiffness median 8 (IQR 33); PF median 6 (IQR 13) | ?           | No                                                                   | ?   |
| Ponzer 1999      | OMAS                         | Mean 84 ± 23 (range 10-100)                                                                        | ?           | ?                                                                    | ?   |
| Repo 2017        | LEFS                         | Mean 66 ± 15                                                                                       | ?           | 17% (ceiling)                                                        | ?   |
| Repo 2018        | VAS-FA                       | Pain mean 73 ± 27; Function mean 76 ± 24; Other complaints mean 74 ± 23                            | ?           | No                                                                   | ?   |
| Repo 2019        | LEFS                         | ?                                                                                                  | ?           | ?                                                                    | ?   |
| Schultz 2020     | FAAM                         | ?                                                                                                  | ?           | ?                                                                    | ?   |
| Shah 2007        | OMAS                         | Weber B mean 75 (95% CI 70-82); Weber C mean 73 (95% CI 61-86)                                     | ?           | ?                                                                    | ?   |
| Suk 2013         | TEFTOM                       | TOM 12 months: mean 33 (95% CI: 32-34)                                                             | ?           | No                                                                   | ?   |
| Turhan 2017      | OMAS                         | Mean 74 ± 24                                                                                       | ?           | First assessment: 27% (ceiling);<br>Second assessment: 29% (ceiling) | ?   |
| Zelle 2017       | AAOS-FAOQ                    | Mean 48 ± 24                                                                                       | ?           | ?                                                                    | ?   |

? = Not reported

**Abbreviations:**

AAOS-FAOQ = American Academy of Orthopaedic Surgeons Foot and Ankle Outcomes Questionnaire

A-FORM = Ankle Fracture Outcome of Rehabilitation Measure

CAT = Computer Adaptive Test

FAAM = Foot and Ankle Ability Measure

IQR = Interquartile Range

LE = Lower Extremity

LEFS = Lower Extremity Functional Scale

MAQ = Munich Ankle Questionnaire

MIC = Minimal Important Change

OMAS = Olerud-Molander Ankle Score

PF = Physical Function

PROMIS = Patient-Reported Outcomes Measurement Information System

SEFAS = Self-Reported Foot and Ankle Score

SMFA = Short Musculoskeletal Function Assessment

TEFTOM = Trauma Expectation Factor Trauma Outcome Measure

VAS-FA = Visual Analogue Scale Foot and Ankle

WOMAC = Western Ontario and McMaster Universities Osteoarthritis Index
